# Supplementary material for: Methane formation mechanism in the initial methanol-to-olefins process catalyzed by SAPO-34
Source: Royal Society of Chemistry journal article supplement (doi:10.1039/c6cy00506c), 2016-01-01
Supplement: c6cy00506c1.pdf [file c6cy00506c1.pdf]

Electronic Supplementary Material (ESI):

## Methane Formation Mechanism in the Initial Methanol-to-Olefins Process Catalyzed by SAPO-34

Zhihong Wei, Yan-Yan Chen, Junfen Li\*, Pengfei Wang, Buqin Jing, Yue He, Mei Dong, Haijun Jiao,  
Zhangfeng Qin, Jianguo Wang, Weibin Fan\*

State Key Laboratory of Coal Conversion, Institute of Coal Chemistry, Chinese Academy of Sciences, 27  
South Taoyuan Road, Taiyuan 030001, China.

Corresponding Author:

\*Junfen Li: tel, +86-351-4046976; fax, +86-351-4041153; e-mail, [lijunfen@sxicc.ac.cn](mailto:lijunfen@sxicc.ac.cn).

\*Weibin Fan: tel, +86-351-4199009; fax, +86-351-4041153; e-mail, [fanwb@sxicc.ac.cn](mailto:fanwb@sxicc.ac.cn).

### Contents:

**Fig. S1** NH<sub>3</sub>-TPD profile of FC-SAPO-34

**Fig. S2** Differential IR spectra for formation of carbonyl groups from ZOCH<sub>3</sub> and methanol. (a) reaction of ZOH and methanol at different temperatures, showing that ZOCH<sub>3</sub> was formed at 160 °C (IR spectrum of ZOH at 30 °C was used as background); (b) reaction of ZOCH<sub>3</sub> and methanol (IR spectrum of ZOCH<sub>3</sub> at 30 °C was considered as background)

**Fig. S3** The chromatogram for the products obtained by pulsing methanol to FC-SAPO-34 at 400 °C.

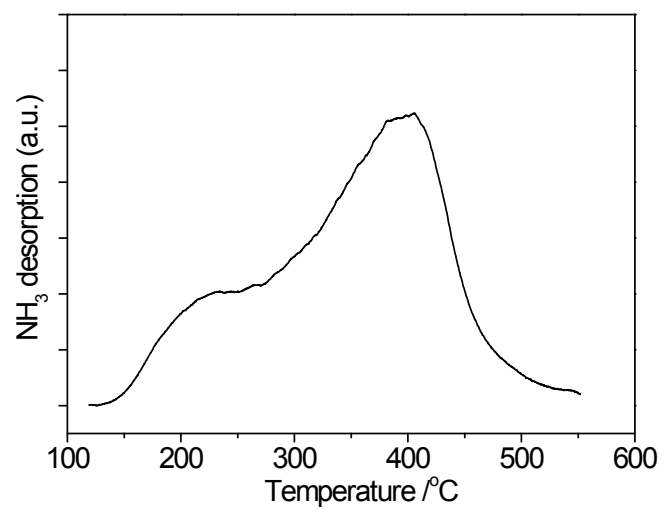

**Fig. S1** NH<sub>3</sub>-TPD profile of FC-SAPO-34

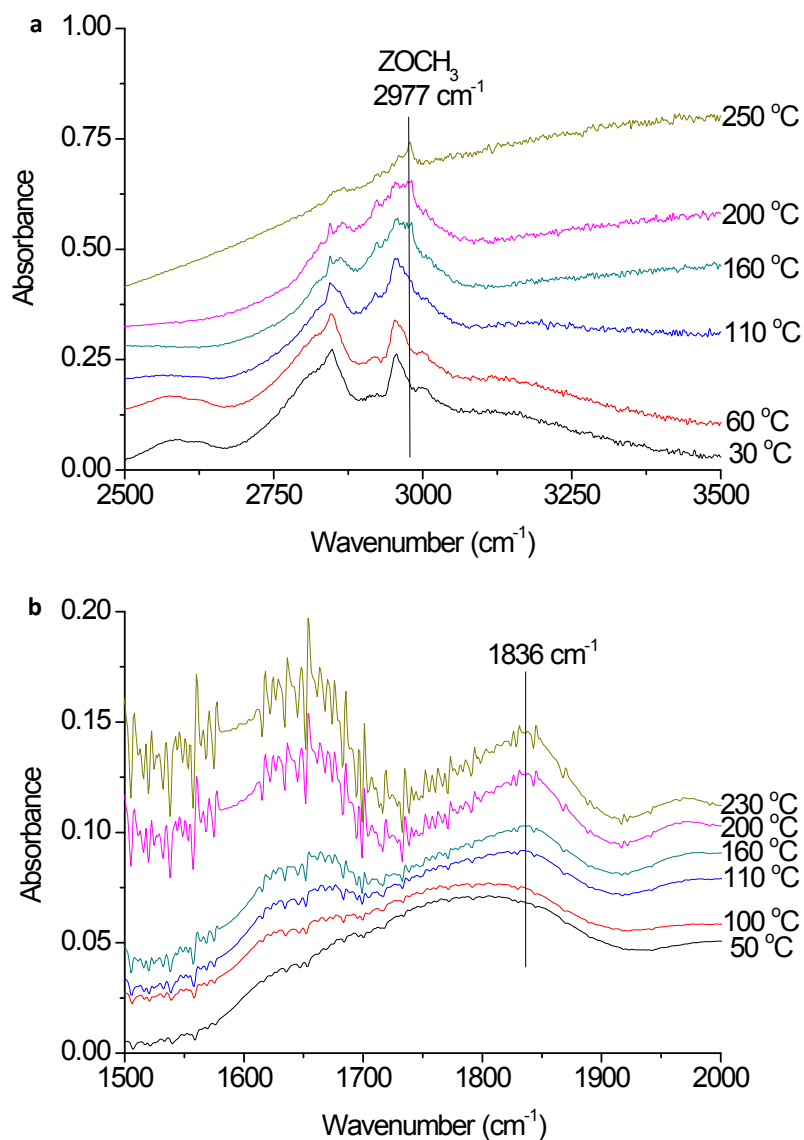

**Fig. S2** Differential IR spectra for formation of carbonyl groups from  $\text{ZOCH}_3$  and methanol. (a) reaction of  $\text{ZOH}$  and methanol at different temperatures, showing that  $\text{ZOCH}_3$  was formed at 160 °C (IR spectrum of  $\text{ZOH}$  at 30 °C was used as background); (b) reaction of  $\text{ZOCH}_3$  and methanol (IR spectrum of  $\text{ZOCH}_3$  at 30 °C was considered as background).

Fig. S2 shows that a new band appears at  $1836 \text{ cm}^{-1}$  in the IR spectra obtained by following the reaction of methanol with SMS at different temperatures, and it increases in intensity with the reaction temperature. This indicates formation of carbonyl group-containing species, and its amount increases with the reaction temperature.

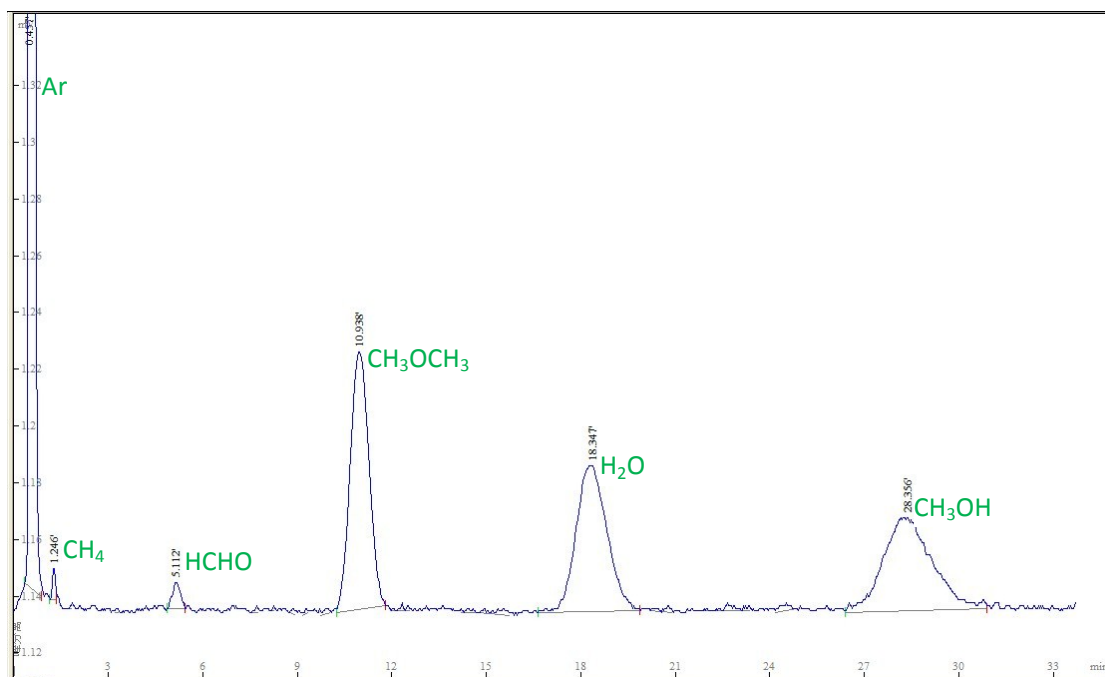

**Fig. S3** The chromatogram for the products obtained by pulsing methanol to FC-SAPO-34 at 400 °C (corresponding to the pulse 1 (methanol) in Table 1). Experimental conditions: 100 mg of FC-SAPO-34 was first pretreated at 550 °C for 2 h in air before the reaction. The reaction was carried out at 400 °C with Ar as carrier gas, the flow rate of which was 300 mL/min. 0.07 mmol of methanol was injected. The chromatogram was obtained on Shimadzu GC-2014C equipped with a Propark-T column and a TCD detector).
